# Supplementary material for: High Throughput Sequencing-Aided Survey Reveals Widespread Mixed Infections of Whitefly-Transmitted Viruses in Cucurbits in Georgia, USA
Source: Viruses. 2021 May 26;13(6):988. doi: 10.3390/v13060988 (PMC8230054; doi:10.3390/v13060988)
Supplement: Supplementary file 1 [file viruses-13-00988-s001.zip › viruses-1148822-si.pdf]

**Supplementary Figure S1:** Cucurbit growing counties in Georgia (light blue). Samples were collected from Colquitt, Worth and Tift (dark blue) representing the major cucurbit growing counties.

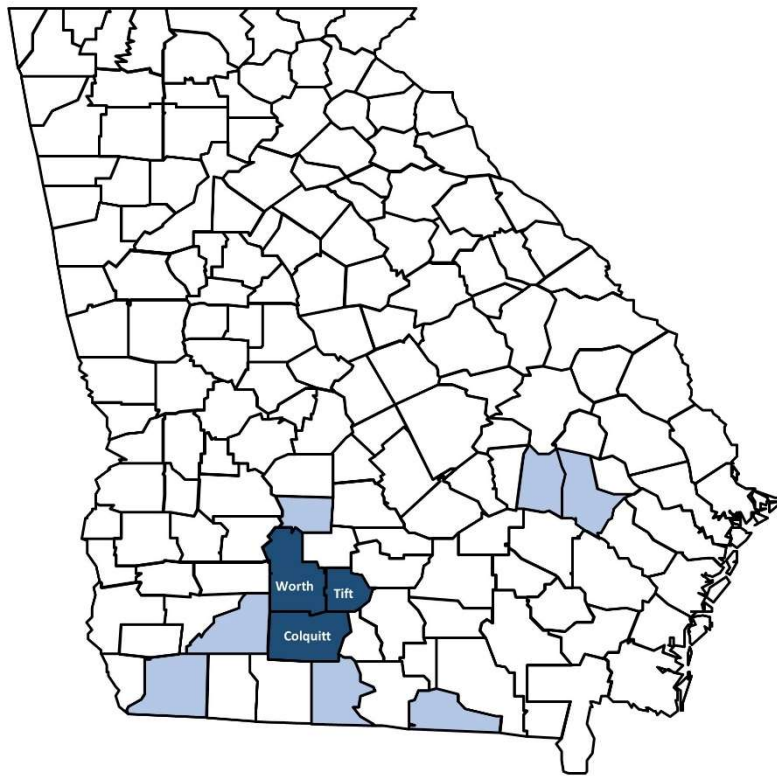

**Supplementary Figure S2:** Phylogenetic relationship of partial coat protein gene sequences of cucurbit yellow stunting disorder virus (CYSDV) isolates from Georgia (Assembled from siRNA sequences) with the corresponding sequences of CYSDV isolates available in the GenBank. The country of origin of the sequences used are shown in parentheses after the accession numbers of viruses. Construction of the phylogenetic trees were done by the neighbor-joining method. The number on each node shows the percentage of bootstrap values (2000 replicates) in which a given node was recovered. Nodes with lower than 50 bootstrap value were collapsed since they were insignificant.

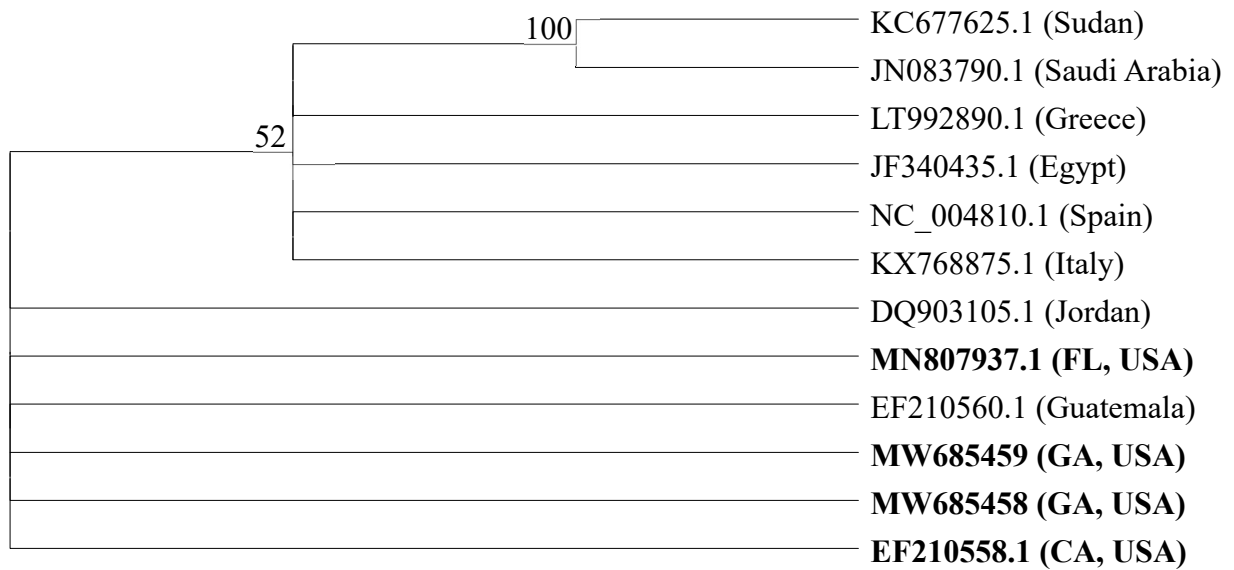

**Supplementary Table S1.** Read statistics of small RNA libraries prepared from symptomatic cucurbit samples.

| <b>Crop</b>       | <b>Sample Names*</b> | <b>Total number of<br/>raw reads</b> | <b>No of reads after<br/>trimming</b> | <b>Average<br/>length after<br/>trimming</b> |
|-------------------|----------------------|--------------------------------------|---------------------------------------|----------------------------------------------|
| <b>Cantaloupe</b> | CaF1-2019            | 12,160,783                           | 10,618,741                            | 24                                           |
|                   | CaF1-2020            | 22,257,504                           | 21,820,714                            | 21                                           |
|                   | CaF2-2019            | 12,546,697                           | 19,719,105                            | 22                                           |
| <b>Cucumber</b>   | CF1-2019             | 11,725,746                           | 11,217,872                            | 23                                           |
|                   | CF2-2019             | 14,177,959                           | 12,342,530                            | 22                                           |
|                   | CF1-2020             | 22,297,989                           | 21,914,383                            | 23                                           |
| <b>Squash</b>     | SF1-2019             | 21,627,355                           | 21,314,433                            | 22                                           |
|                   | SF1-2020             | 17,428,537                           | 17,153,993                            | 22                                           |
|                   | SF2-2020             | 22,143,767                           | 21,666,240                            | 22                                           |

\*In the sample names, 'Ca,' 'C' and 'S' denote the crop, F1 and F2 represent the field, 2019 and 2020 is the year in which the samples were collected.

**Supplementary Table S2.** Distribution of viruses in different counties in Georgia in 2019 and 2020.

| Crop<br>Virus <sup>+</sup> | Colquitt County |           |           |           |            |           |           | Tift county |            |            | Worth County |           |           |
|----------------------------|-----------------|-----------|-----------|-----------|------------|-----------|-----------|-------------|------------|------------|--------------|-----------|-----------|
|                            | Cantaloupe      |           | Cucumber  |           | Squash     |           | Zucchini  | Cucumber    | Squash     |            | Cucumber     | Squash    | Zucchini  |
|                            | 2019            | 2020      | 2019      | 2020      | 2019       | 2020      | 2020      | 2020        | 2019       | 2020       | 2020         | 2020      | 2020      |
| CuLCrV                     | 6               | 21        | 36        | 34        | 88         | 50        | 39        | 13          | 107        | 207        | 19           | 17        | 13        |
| CySDV                      | 12              | 36        | 6         | 24        | 27         | 43        | 5         | 17          | 4          | 99         | 37           | 19        | 20        |
| CCYV                       | 21              | 20        | 53        | 12        | 36         | 26        | 6         | 20          | 2          | 217        | 39           | 20        | 17        |
| CuLCrV+ CySDV              | 4               | 14        | 2         | 22        | 24         | 43        | 5         | 10          | 3          | 95         | 17           | 16        | 13        |
| CuLCrV+ CCYV               | 6               | 10        | 31        | 12        | 39         | 26        | 6         | 13          | 2          | 177        | 18           | 16        | 13        |
| CySDV +CCYV                | 12              | 18        | 6         | 5         | 9          | 23        | 1         | 17          | 0          | 86         | 36           | 19        | 17        |
| CuLCrV+ CySDV + CCYV       | 4               | 9         | 2         | 5         | 9          | 23        | 1         | 10          | 0          | 83         | 17           | 16        | 12        |
| Total number of samples    | <b>21</b>       | <b>40</b> | <b>68</b> | <b>36</b> | <b>100</b> | <b>50</b> | <b>40</b> | <b>20</b>   | <b>113</b> | <b>252</b> | <b>40</b>    | <b>20</b> | <b>20</b> |

Note. All samples collected in 2020 were also tested for cucurbit aphid borne yellows virus (CABYV), squash vein yellowing virus (SqVYV), and sida golden mosaic virus (SiGMV). These viruses were not detected in any of the samples tested.
